# Supplementary material
Source: publisher figshare collection journal article supplement (https://diabetesjournals.figshare.com/ndownloader/files/28152663)

**Supplementary Table 1. List of antibodies**

| <b>Antibody</b>                         | <b>Host</b> | <b>Application</b> | <b>Catalog number</b> | <b>Vendor</b>             |
|-----------------------------------------|-------------|--------------------|-----------------------|---------------------------|
| anti-HSP90                              | Mouse       | WB                 | sc-13119              | Santa Cruz Biotechnology  |
| anti- $\alpha$ -tubulin                 | Mouse       | WB                 | T5168                 | Sigma-Aldrich             |
| anti-PRMT1                              | Rabbit      | WB                 | 07-404                | EMD Millipore             |
| Total OXPHOS Rodent WB                  | Mouse       | WB                 | ab110413              | Abcam                     |
| anti-AKT                                | Rabbit      | WB                 | #9272                 | Cell Signaling Technology |
| anti-p-AKT (S473)                       | Rabbit      | WB                 | #9271                 | Cell Signaling Technology |
| anti-FOXO1                              | Rabbit      | WB                 | #9454                 | Cell Signaling Technology |
| anti-FOXO3a                             | Rabbit      | WB                 | #12829                | Cell Signaling Technology |
| anti-PRMT6                              | Rabbit      | WB                 | #14641                | Cell Signaling Technology |
| anti-LC3A/B                             | Rabbit      | WB                 | #4108                 | Cell Signaling Technology |
| Autophagy sampler kit                   | Rabbit      | WB                 | #4445                 | Cell Signaling Technology |
| anti-AMPK $\alpha$                      | Rabbit      | WB                 | #2532                 | Cell Signaling Technology |
| anti-p-AMPK $\alpha$ (T172)             | Rabbit      | WB                 | #2535                 | Cell Signaling Technology |
| anti-HSL                                | Rabbit      | WB                 | #4107                 | Cell Signaling Technology |
| anti-p-HSL (S660)                       | Rabbit      | WB                 | #4126                 | Cell Signaling Technology |
| anti-UCP1                               | Rabbit      | WB                 | ab10983               | Abcam                     |
| ANTI-FLAG® M2-Peroxidase (HRP) antibody | Mouse       | WB                 | A8592                 | Sigma-Aldrich             |
| PE anti-mouse CD140a Antibody           | Rat         | Cell isolation     | 135905                | BioLegend                 |
| Anti-PE MicroBeads                      | Mouse       | Cell isolation     | 130-048-801           | Miltenyi Biotec           |
| anti-Pyruvate Dehydrogenase             | Mouse       | IF                 | ab110333              | Abcam                     |
| anti-F4/80                              | Rat         | IHC                | ab6640                | Abcam                     |

|                                                                     |        |      |         |                           |
|---------------------------------------------------------------------|--------|------|---------|---------------------------|
| anti-LC3B                                                           | Mouse  | IF   | #83506  | Cell Signaling Technology |
| anti-Perilipin-1                                                    | Rabbit | IF   | #9349   | Cell Signaling Technology |
| Alexa Fluor® 568<br>Goat Anti-Rabbit<br>(IgG) secondary<br>antibody | Goat   | IF   | A11011  | Invitrogen                |
| Alexa Fluor® 488<br>Goat Anti-Mouse<br>(IgG) secondary<br>antibody  | Goat   | IF   | A11001  | Invitrogen                |
| anti-rat IgG-HRP                                                    | Goat   | IF   | sc-2006 | Santa Cruz Biotechnology  |
| Anti-FOXO3a                                                         | Rabbit | ChIP | #2497   | Cell Signaling Technology |

## Supplementary Fig. Legends.

### Supplementary Fig. 1. Adipocyte-specific depletion of *Prmt1* eliminates expression of *Prmt1* in mature adipocytes.

**A.** *Prmt1* mRNA levels in mature adipocytes (M.A) and stromal vascular fraction (SVF) from 2-month-old C57BL/6 mice with NCD (n=4 and n=5, respectively). Relative mRNA expression was normalized to *L32* expression. **B.** Western blot analysis showing PRMT1 protein levels from various adipose tissues as well as the liver and the skeletal muscle from *Prmt1* f/f and FKO mice (n=3/group). **C.** Western blot analysis showing PRMT1 protein levels in mature adipocytes from eWAT and iWAT. Representative blot from three independent experiments was shown. Data in **A** represent mean  $\pm$  SEM. \*\*\*,  $P < 0.001$ .

### Supplementary Fig. 2. Depletion of *Prmt1* does not affect glucose and lipid metabolism under normal chow diet conditions.

**A-C.** Body weight (**A**), organ weight (as a percentage of body weight) (**B**), and fat and lean mass (**C**) in 4-month-old *Prmt1* f/f and FKO mice fed normal chow diet (NCD) were shown (n=6-8/group). **D-F.** *Ad libitum* fed (**D**), 6 hr fasted (**E**), and overnight fasted (O/N, 16 hr) (**F**) blood glucose levels from 4-month-old *Prmt1* f/f and FKO mice under NCD (n=6-8/group). **G** and **H.** Plasma non-esterified fatty acids levels (**G**) and plasma triglyceride levels (**H**) in 6 hr-fasted 4-month-old *Prmt1* f/f and FKO mice under NCD (n=5-6/group). **I.** Insulin tolerance test (ITT) of 4-month-old *Prmt1* f/f and FKO mice under NCD. ITT was conducted after the intraperitoneal injection of insulin (0.5 units/kg) on 6 hr-fasted mice (n=6-8/group). Data in **A-I** represent mean  $\pm$  SEM. \*,  $P < 0.05$ , \*\*,  $P < 0.01$ .

### Supplementary Fig. 3. Adipocyte specific *Prmt1* KO mice shows reduced eWAT.

**A-G.** Representative images showing eWAT (**A**), iWAT (**B**), rpWAT (**C**), pWAT (**D**), BAT (**E**), Skeletal muscle (**F**), and Liver (**G**) from *Prmt1* f/f and FKO mice fed HFD for 16 weeks. (**H**) Body weight, fat, and lean mass of *Prmt1* f/f and FKO mice fed HFD for 10 weeks (n=8-13/group). Data in **H** represent mean  $\pm$  SEM.

### Supplementary Fig. 4. Adipocyte-specific *Prmt1* KO mice did not greatly affect adipocyte size in iWAT.

**A.** Representative images of hematoxylin and eosin-stained sections from iWAT depots of *Prmt1* f/f and FKO mice with 12 weeks of high-fat feeding. Scale bar = 250  $\mu$ m. **B.** Quantification of number and size of adipocytes from iWAT of *Prmt1* f/f and FKO mice with 12 weeks of high-fat feeding. Data in **B** represent mean  $\pm$  SEM.

### Supplementary Fig. 5. *Prmt1* deficiency does not greatly affect lipolysis.

**A.** Relative mRNA levels of genes encoding lipases (ATGL, HSL) in eWAT (left) and iWAT (right) from *Prmt1* f/f and FKO mice fed HFD for 12 weeks (n=3-6/group). **B.** Protein levels of HSL and p-HSL in eWAT (left) and iWAT (right) from *Prmt1* f/f and FKO mice fed HFD for 12 weeks (n=6/group). **C.** Released glycerol levels from explants of eWAT (left) and iWAT (right) of *Prmt1* f/f and FKO mice fed HFD for 20 weeks (n=4/group). Lipolysis was stimulated with 10  $\mu$ M forskolin (Fsk) for 2 hr. Glycerol levels were normalized to tissue weight. Data in **A** and **C** represent mean  $\pm$  SEM. \*,  $P < 0.05$ , n.s.: not significant.

**Supplementary Fig. 6. Depletion of *Prmt1* enhanced expression of AMPK**

**A.** Relative mRNA levels of *Prkaa1* and *Prkaa2* in 3T3-L1 adipocytes expressing either the control virus (Ad-US) or shRNA against *Prmt1* (Ad-*Prmt1i*). (n=3/group). mRNA levels were normalized by *L32* expression. **B.** PRMT1, PRMT6, FOXO3, AMPK and p-AMPK levels in 3T3-L1 adipocytes expressing either the control virus (Ad-US) or shRNA against *Prmt1* (Ad-*Prmt1i*). Representative data were shown. **C.** Relative mRNA levels of *Prmt* isoforms in mature adipocytes of eWAT from *Prmt1* f/f and FKO mice fed HFD for 10 weeks (n=3-4/group). **D.** Protein levels of PRMT6 and FOXOs in eWAT from *Prmt1* f/f and FKO mice fed HFD for 16 weeks (n=4-5/group). **E.** Relative mRNA levels of *Prmt1*, *Prmt6*, *Foxo1*, and *Foxo3* in 3T3-L1 adipocytes expressing either the control virus (Ad-US) or shRNA against *Prmt1* (Ad-*Prmt1i*). (n=3/group). mRNA levels were normalized by *L32* expression. **F.** p-AMPK $\alpha$  and AMPK $\alpha$  levels in 3T3-L1 adipocytes with ectopic expression of PRMT6 or FOXO3. Data in **A**, **C**, and **E** represent mean  $\pm$  SEM. \*\*, P < 0.01, \*\*\*, P < 0.001.

**Supplementary Fig. 7. Depletion of *Prmt1* promotes an increased expression of components in the autophagy.**

**A.** Relative mRNA levels of autophagy markers in mature adipocytes of eWAT from *Prmt1* f/f and FKO mice fed HFD for 10 weeks (n=3-4/group). mRNA levels were normalized by *L32*. **B.** Quantitation of proteins involved in the autophagy shown in Fig. 4B. Data in **A** and **B** represent mean  $\pm$  SEM. \*, P < 0.05, \*\*, P < 0.01, \*\*\*, P < 0.001.

**Supplementary Fig. 8. Depletion of *Prmt1* leads to the enhanced autophagic flux.**

**A.** Quantitation of LC3-II/LC3-I ratio for Fig. 4C (top) and 4D (bottom). **B.** Relative LC3-II levels with injection of lysosomal protease inhibitor leupeptin in Liver (top) or BAT (bottom) of *Prmt1* f/f mice and FKO mice. **C.** Co-localization of LC3B and PLIN1 in iWAT of *Prmt1* f/f mice and FKO mice. Scale bar = 20  $\mu$ m. **D.** Quantitation of fluorescent intensity to measure co-localization of LC3B and PLIN1 from eWAT (Fig. 4E) and iWAT (Supplementary Fig. 8C). Data in **A** and **D** represent mean  $\pm$  SEM. \*, P < 0.05, \*\*\*, P < 0.001.

**Supplementary Fig. 9. *Prmt1* deficiency promotes increased mitochondrial function in adipocytes.**

**A.** Quantitation of the intensity of mitotracker staining in eWAT (Fig. 5B). **B.** Measurement of relative mitochondrial DNA (mtDNA) in eWAT (top) and iWAT (bottom) from *Prmt1* f/f and FKO mice fed HFD for 16 weeks (n=4-5/group). Relative mtDNA was normalized to nuclear DNA (nDNA, *H19*). **C.** Relative mRNA levels of mitochondrial markers in eWAT (left) and iWAT (right) from *Prmt1* f/f and FKO mice after 12 weeks of high-fat feeding (n=3-6/group). mRNA levels were normalized by *L32* expression. Data in **A-C** represent mean  $\pm$  SEM. \*, P < 0.05, \*\*, P < 0.01, \*\*\*, P < 0.001.

**Supplementary Fig. 10. *Prmt1* deficiency promotes increased mitochondrial function in WAT but not in BAT.**

**A-D.** OxPhos protein levels in rpWAT (**A**), pWAT (**B**), iWAT (**C**) or BAT (**D**) from *Prmt1* f/f and FKO mice after 12 weeks of high-fat feeding (n=5-7/group).

**Supplementary Fig. 11. *Prmt1* deficiency promotes increased lipid catabolism via an AMPK pathway.**

**A.** PRMT1, AMPK $\alpha$ , p-AMPK, LC3, and OxPhos protein levels in differentiated 3T3-L1 cells. Cells were transfected with control siRNA, *Prmt1* siRNA, *Prkaa*, or *Prmt1* siRNA + *Prkaa* siRNA before the initiation of differentiation. Representative data from three independent experiments were shown. **B.** PRMT1, AMPK $\alpha$ , p-AMPK, LC3, and OxPhos protein levels in differentiated primary adipocytes (derived from the AP cells of eWAT) from *Prmt1* f/f mice. Cells were transfected with control siRNA, *Prmt1* siRNA, *Prkaa*, or *Prmt1* siRNA + *Prkaa* siRNA before the initiation of differentiation. Representative data from three independent experiments were shown.

**Supplementary Fig. 12. *Prmt1* deficiency does not affect the intrinsic lipid catabolism in BAT.**

**A.** Western blot analysis showing UCP1 protein levels in BAT (top) or iWAT (bottom) from *Prmt1* f/f and FKO mice after 12 weeks of high-fat feeding (n=3-6/group). **B.** Representative images of hematoxylin and eosin-stained sections from BAT depots of *Prmt1* f/f and FKO mice with 12 weeks of HFD feeding under the room temperature (RT) or cold stress. Scale bar = 250  $\mu$ m.

**Supplementary Fig. 13. *Prmt1* deficiency promotes an increased energy expenditure.**

**A-D.** Indirect calorimetric analysis using *Prmt1* f/f and FKO mice with 11 weeks of HFD feeding. Body weight (**A**), Regression-adjusted energy expenditure for body weight (**B**), Regression-adjusted energy expenditure for food intake (**C**), and food intake (**D**) were shown (n=6/group). Data in **A-D** represent mean  $\pm$  SEM. \*\*, P < 0.01, \*\*\*, P < 0.001.

**Supplementary Fig. 14. Adipocyte-specific *Prmt1* KO mice promotes adipose tissue inflammation.**

**A.** Representative images of F4/80 immunohistochemistry of eWAT depots (top) or iWAT depots (bottom) from *Prmt1* f/f and FKO mice with 12 weeks of high-fat feeding. Scale bar = 100  $\mu$ m. **B.** Relative mRNA levels of classic macrophage (M1) and alternative macrophage (M2) markers of eWAT from *Prmt1* f/f and FKO mice fed HFD for 12 weeks (n=4-6/group). mRNA levels were normalized to *L32* expression. **C.** Plasma IL-6 levels and plasma TNF $\alpha$  levels from *Prmt1* f/f and FKO mice with 14 or 12 weeks of high-fat feeding (n=4-6/group). Data in **B** and **C** represent mean  $\pm$  SEM. \*, P < 0.05.

**Supplementary Fig. 15. Adipocyte-specific *Prmt1* deficiency alters glucose and lipid metabolism.**

**A.** *Ad libitum* fed blood glucose levels from *Prmt1* f/f and FKO mice fed HFD for 9-10 weeks (n=11-12/group). **B.** Plasma insulin levels in 6 hr-fasted of *Prmt1* f/f and FKO mice fed HFD for 14 weeks (n=7-8/group). **C.** Plasma non-esterified fatty acids levels in 6 hr-fasted *Prmt1* f/f and FKO mice fed HFD for 12 weeks (n=5-6/groups). **D.** Relative mRNA levels of genes involved in lipid metabolism in the liver from *Prmt1* f/f and FKO mice fed HFD for 12 weeks (n=5-6/group). Relative mRNA expression was normalized to *L32* expression. **E.** Representative western blot analysis for AKT and p-AKT levels in BAT (left), iWAT (middle) and skeletal muscle (right) from *Prmt1* f/f and FKO mice fed HFD for 10 weeks. Levels of p-AKT (serine 473), total AKT, PRMT1, and loading control (HSP90) in the absence or in the presence of insulin injection were shown. All tissues were collected

from mice post PBS or insulin (0.2 units/mouse) injection. **F.** Quantitation of p-AKT over AKT in BAT (left), iWAT (middle) and skeletal muscle (right) from *Prmt1* f/f and FKO mice fed HFD for 10 weeks (n=3/group). Data in **A-D** and **F** represent mean  $\pm$  SEM. \*,  $P < 0.05$ , \*\*,  $P < 0.01$ .

**Supplementary Fig. 16. Proposed model for PRMT-mediated regulation of lipid homeostasis.**

In wild-type mice (left), obesity induces expression of PRMT1, inhibiting excessive lipid catabolism in WAT to prevent unnecessary ectopic accumulation of lipid in the peripheral tissues. In the absence of adipose PRMT1 (right), lipid catabolism in WAT is enhanced via the activation of AMPK and subsequent induction of lipophagy as well as mitochondrial catabolism, leading to the redistribution of lipid in the peripheral tissues and the resultant dysregulation of glucose and lipid homeostasis in the diet-induced obesity setting.

# Supplementary Fig. 1

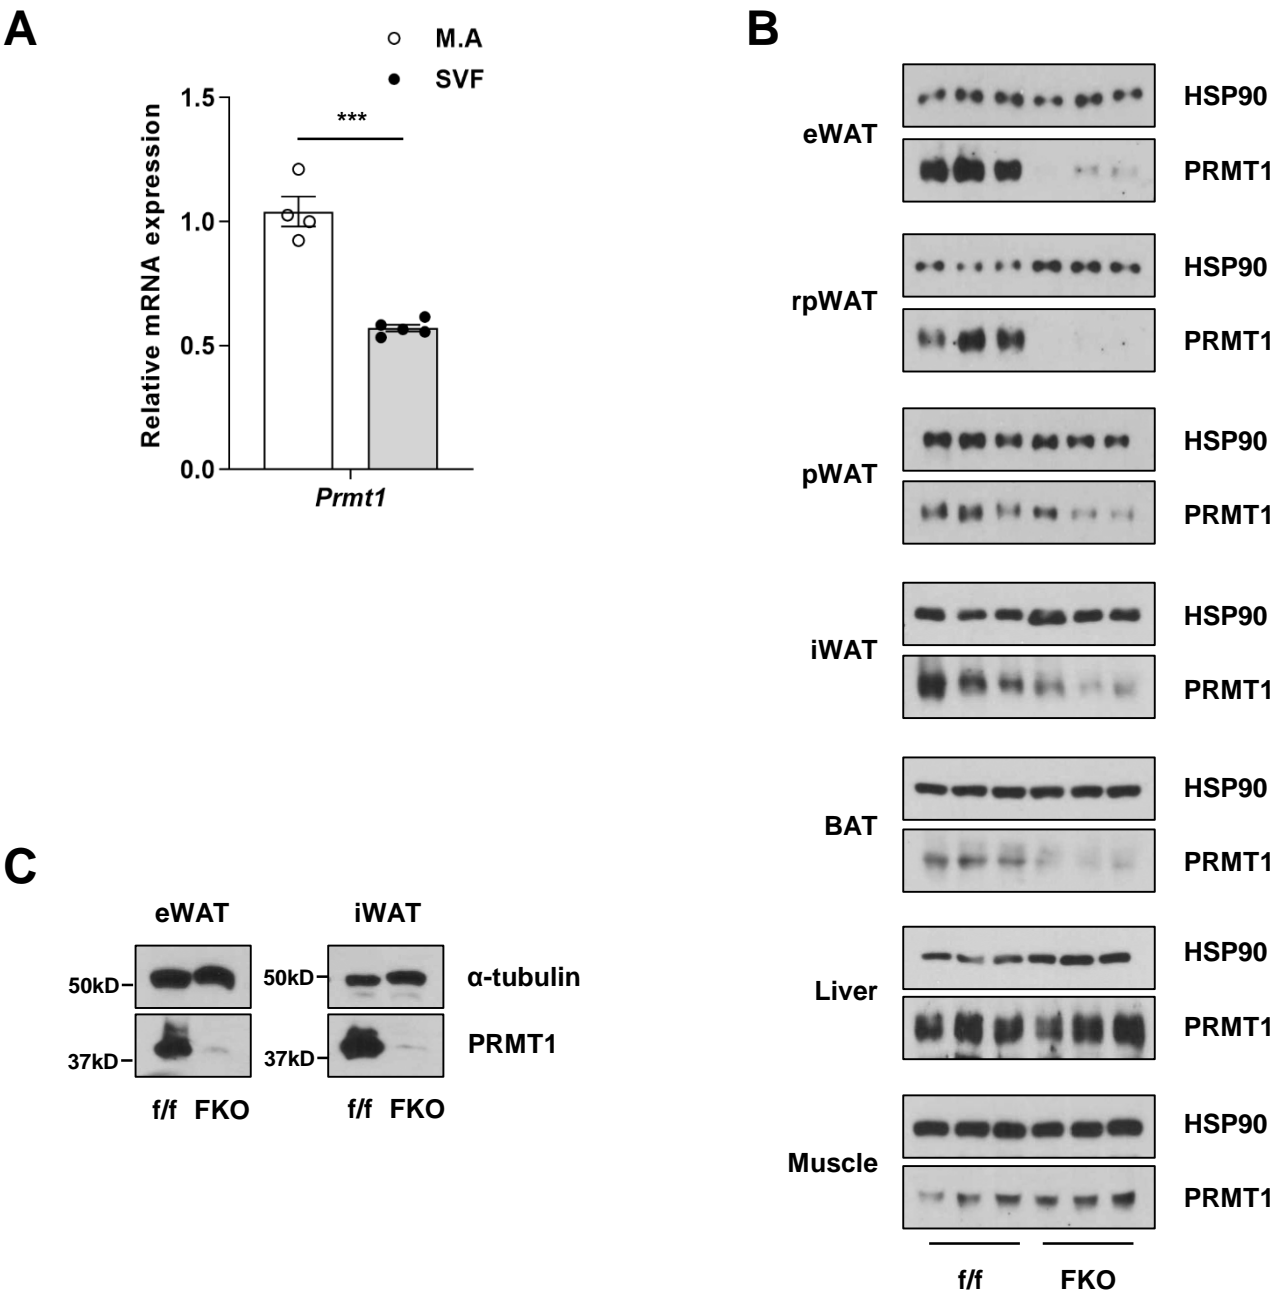

Supplementary Fig. 2

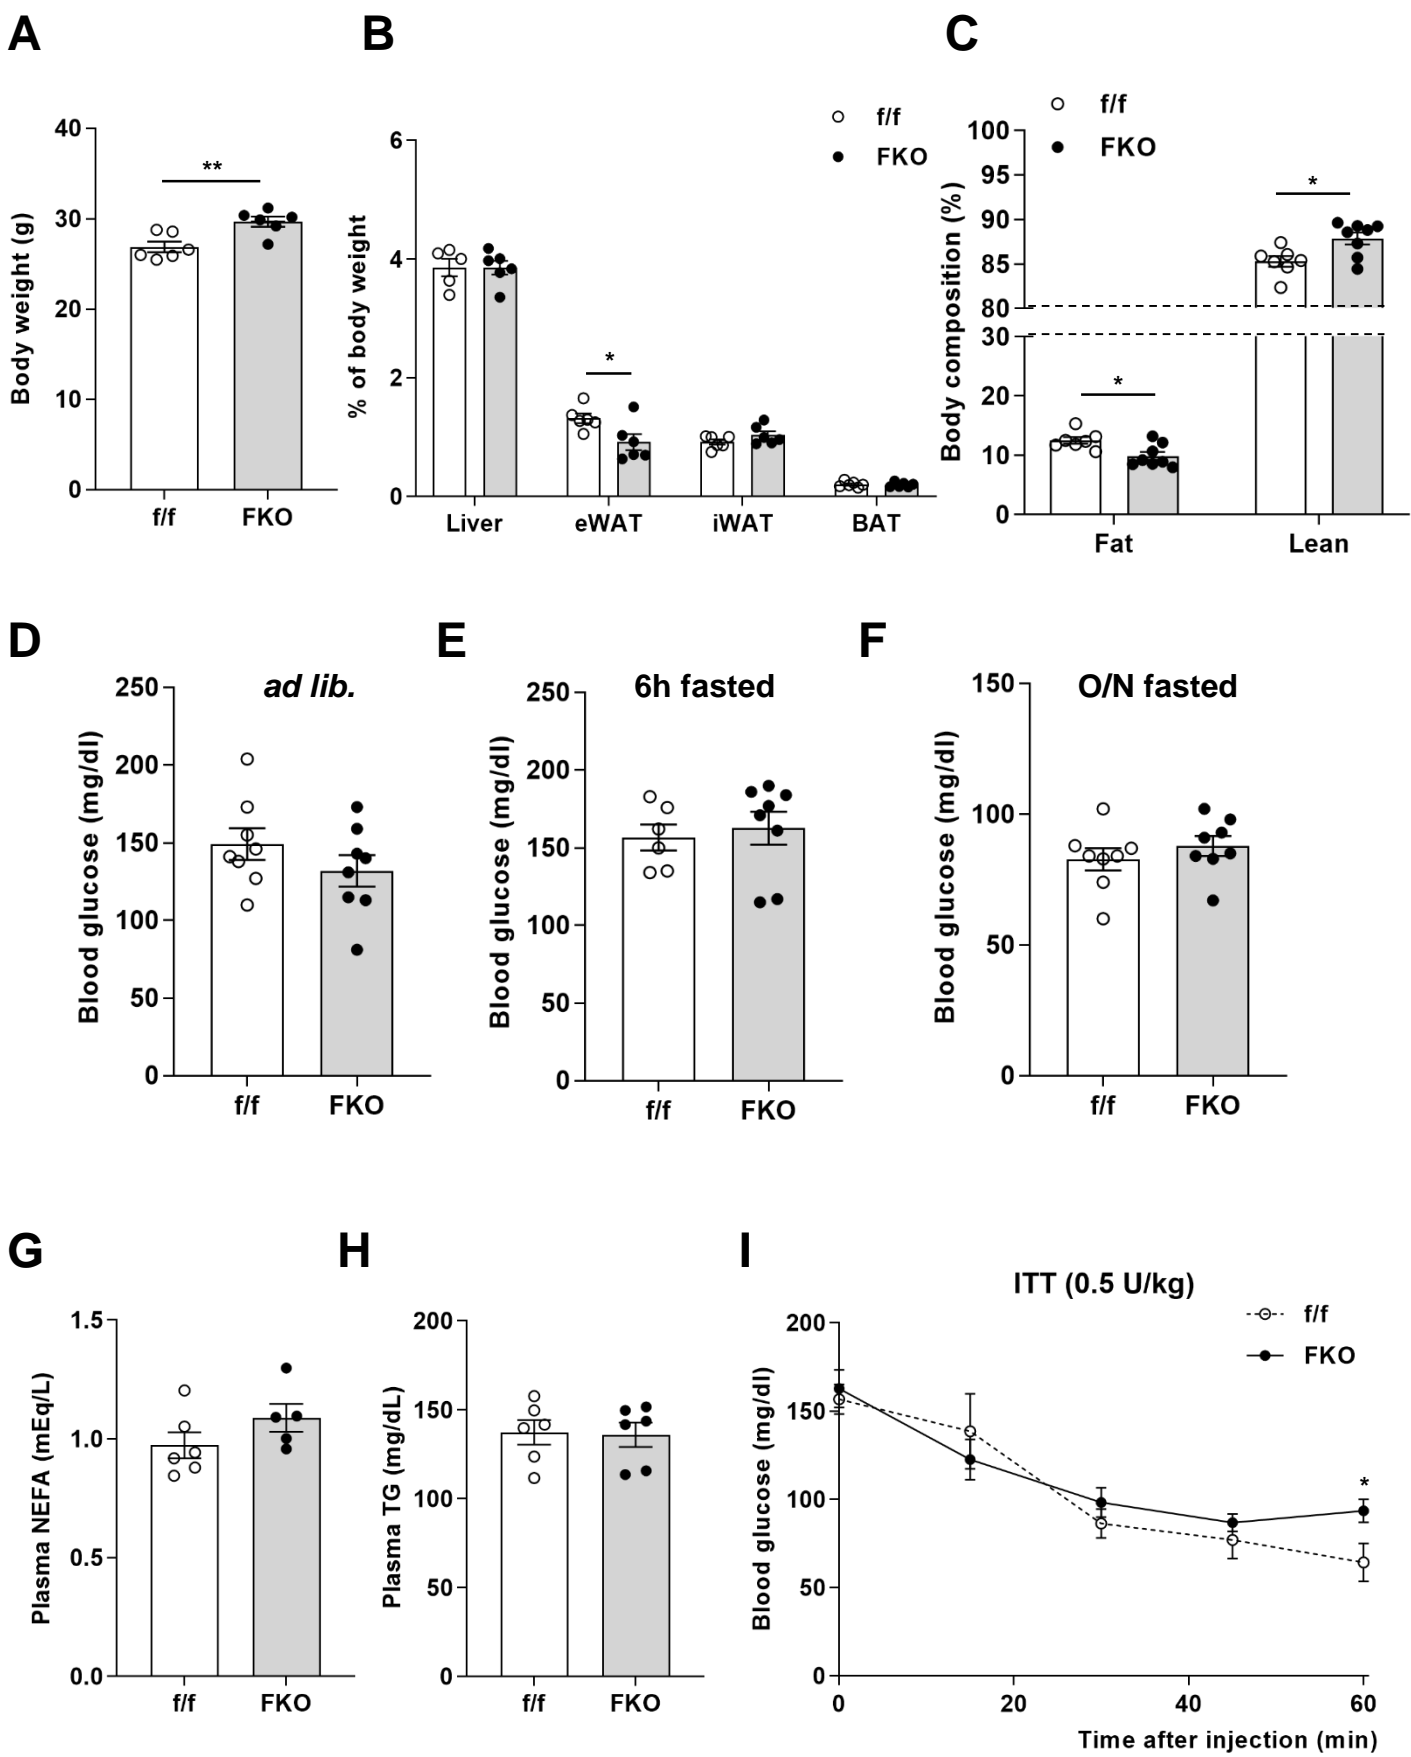



# Supplementary Fig. 3

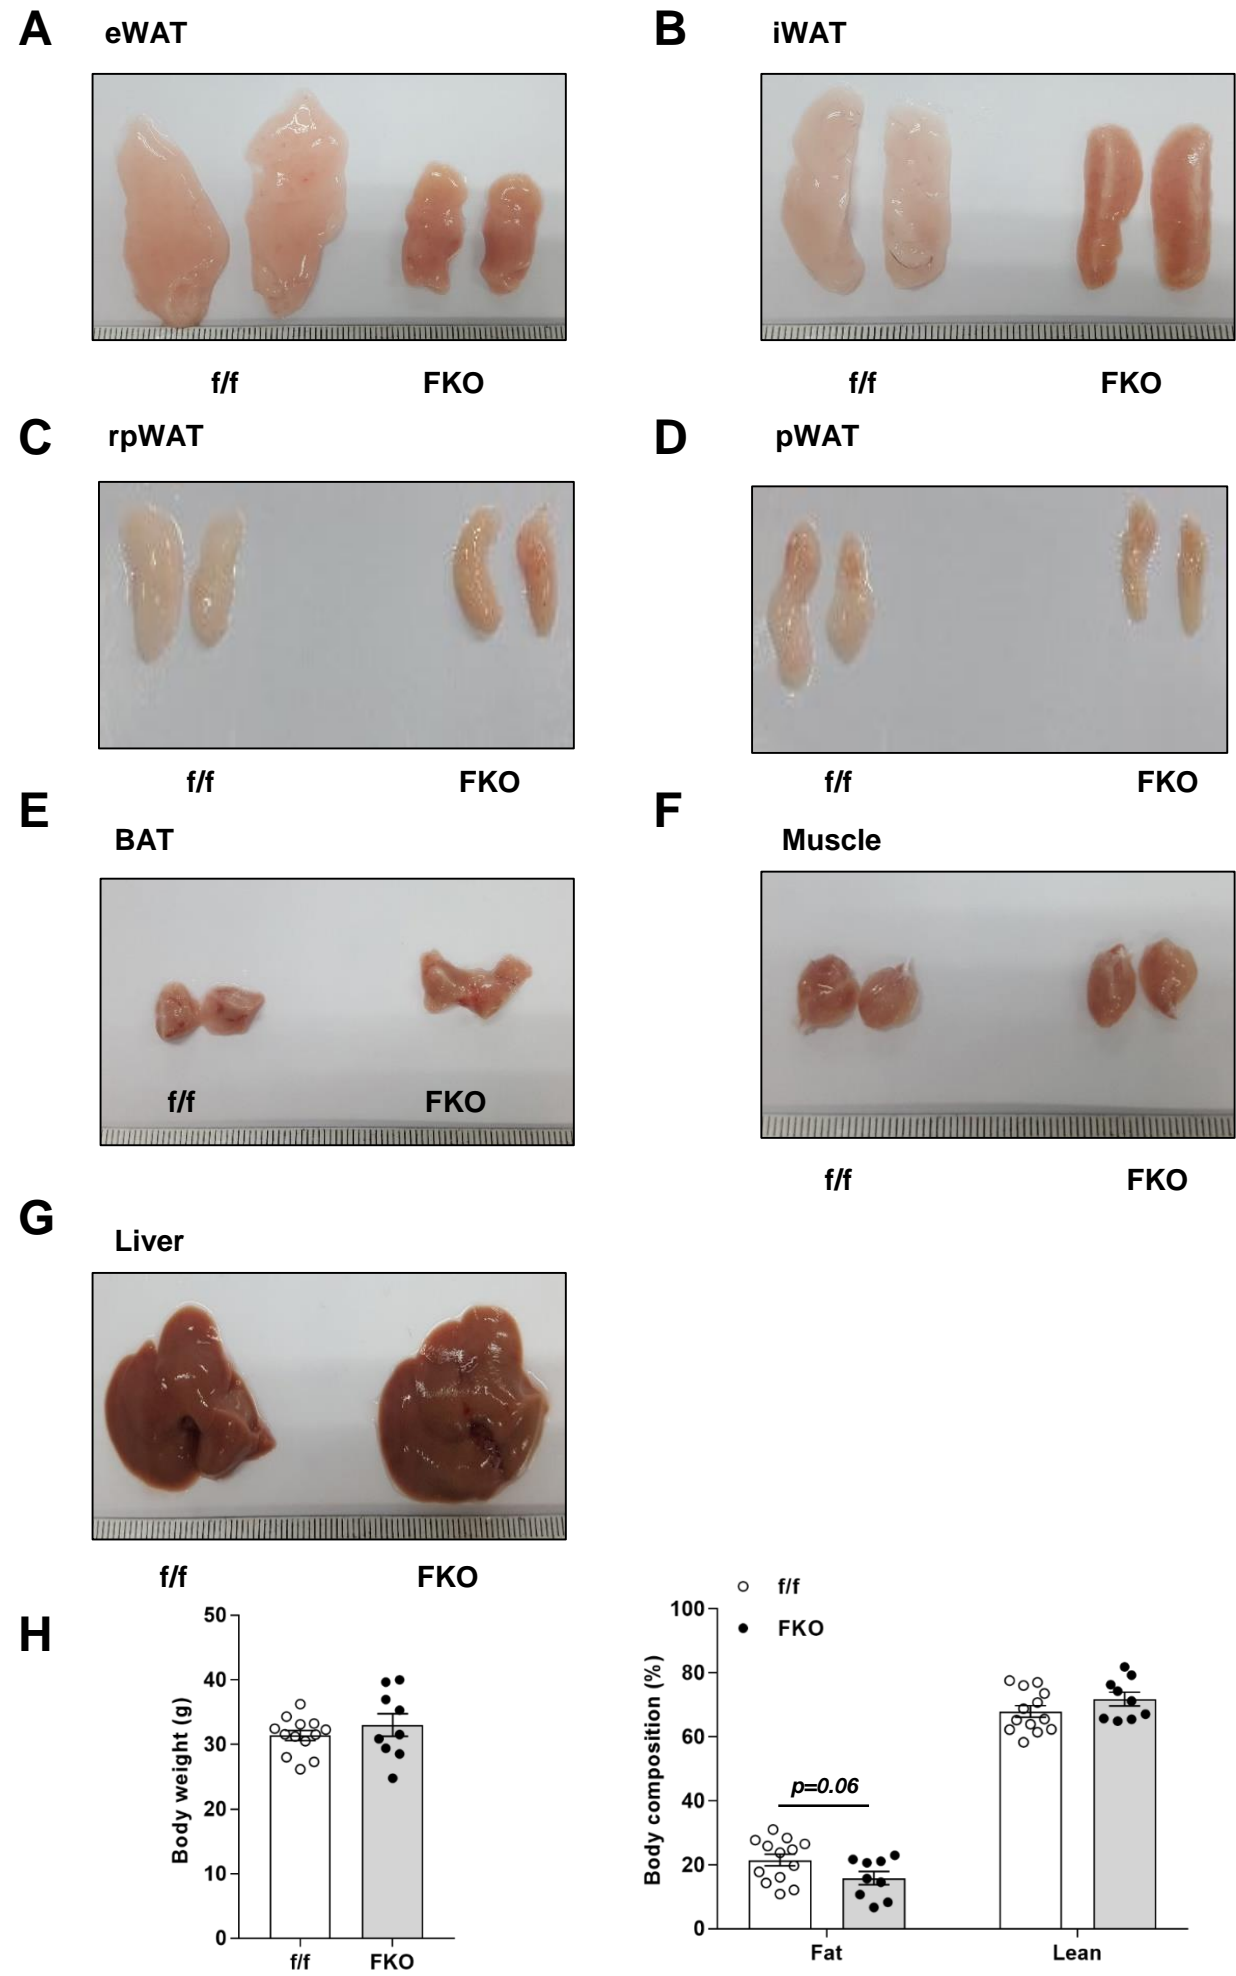

Supplementary Fig. 4

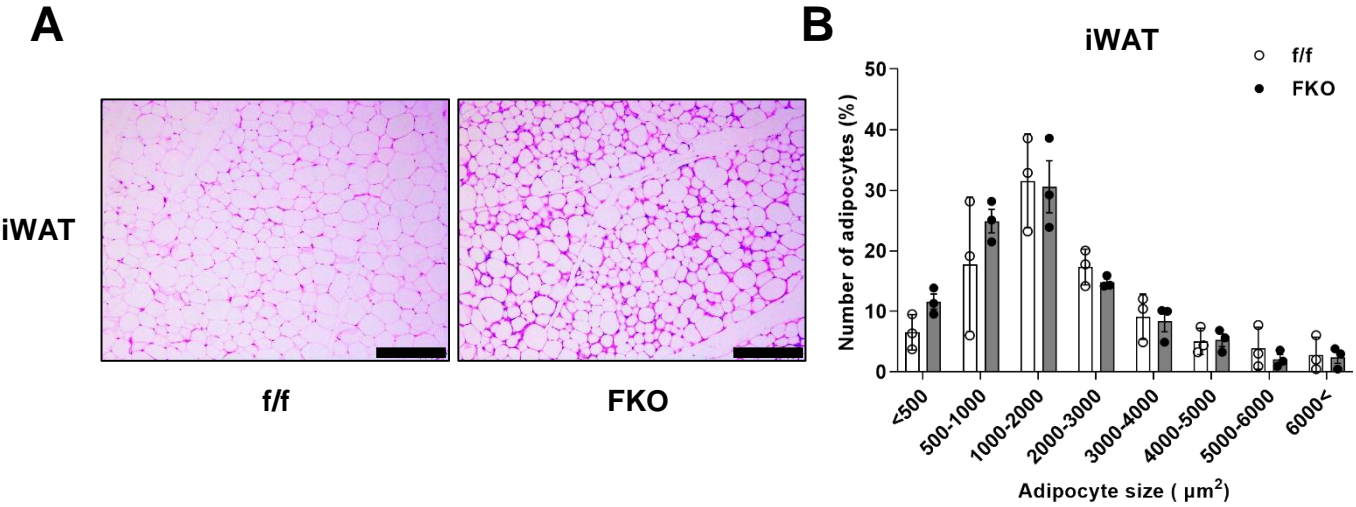

# Supplementary Fig. 5

A

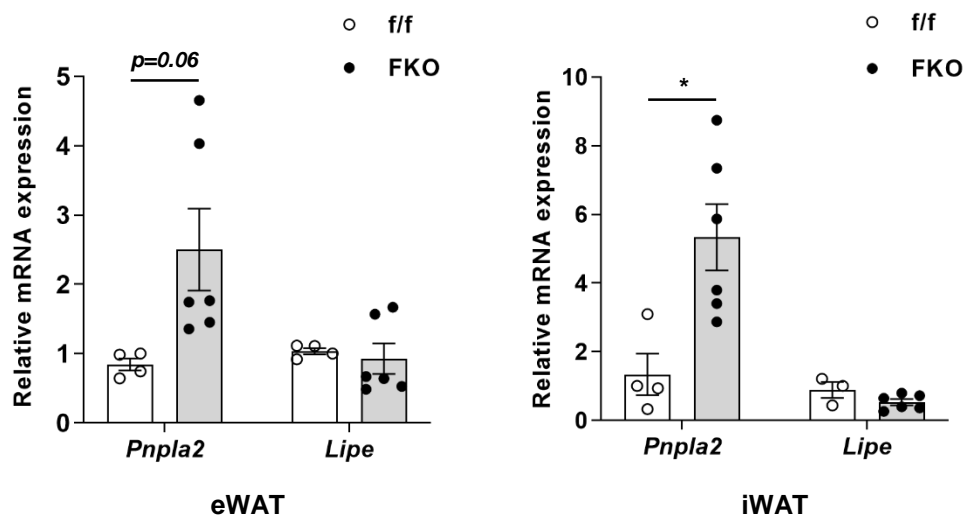

B

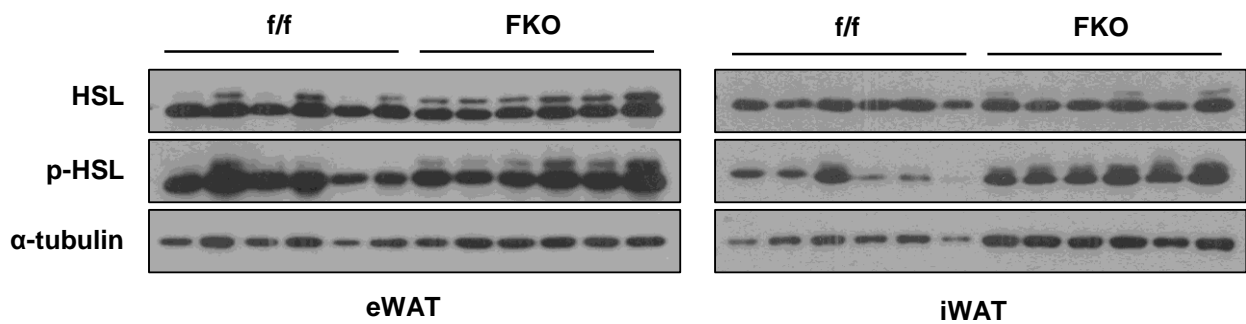

C

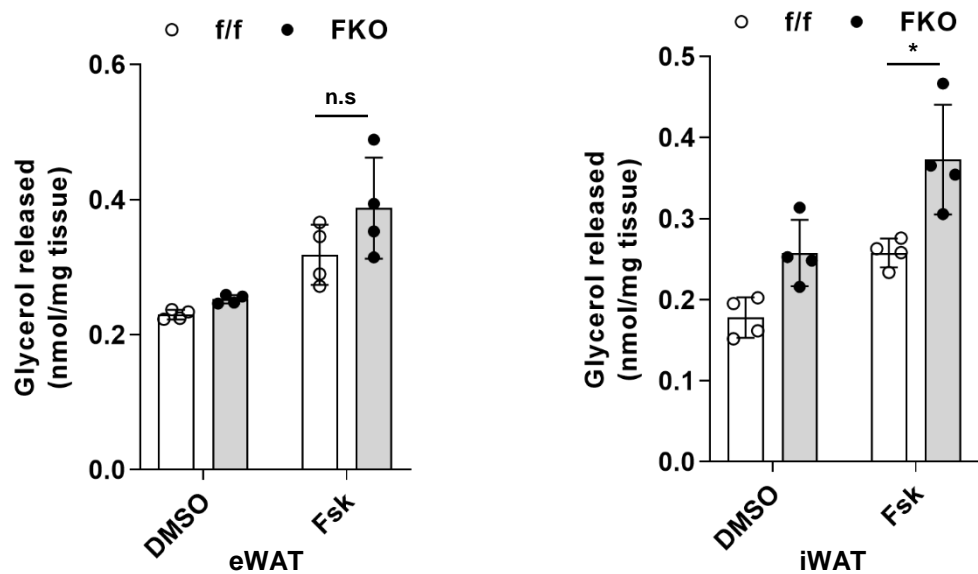

# Supplementary Fig. 6

**A**

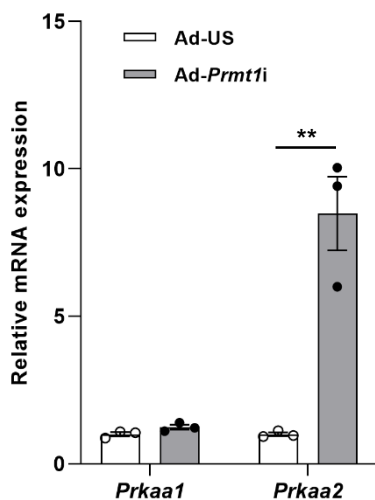

**B**

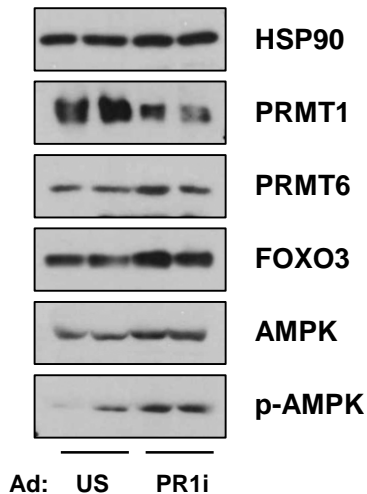

**C**

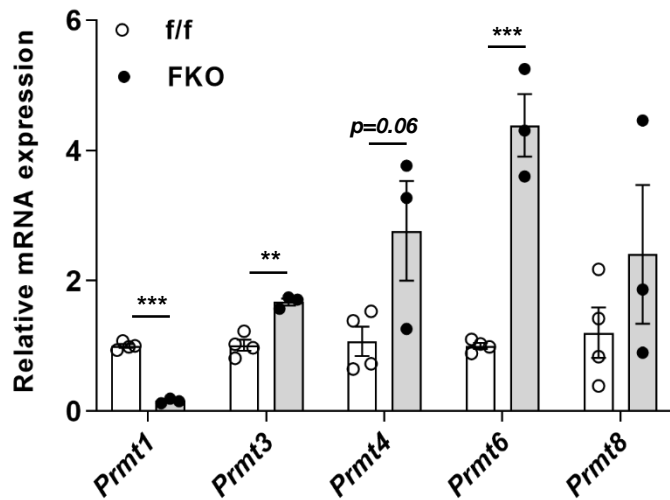

**D**

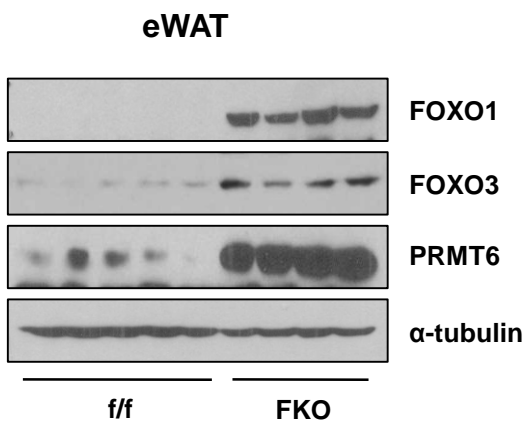

**E**

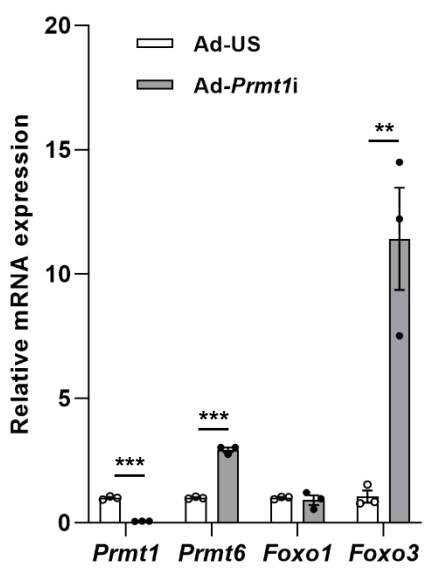

**F**

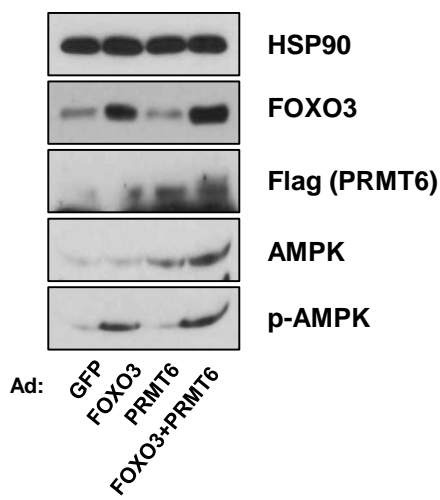

Supplementary Fig. 7

A

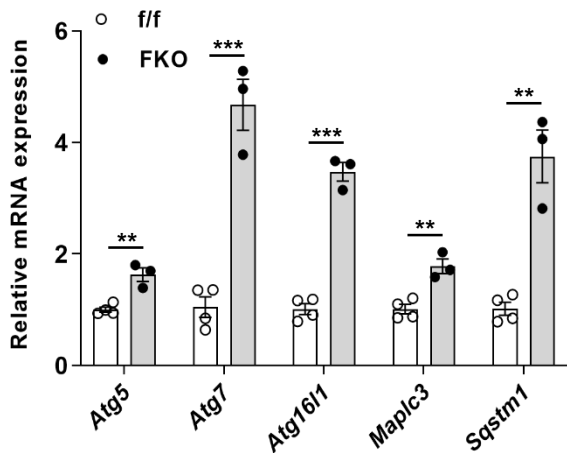

B

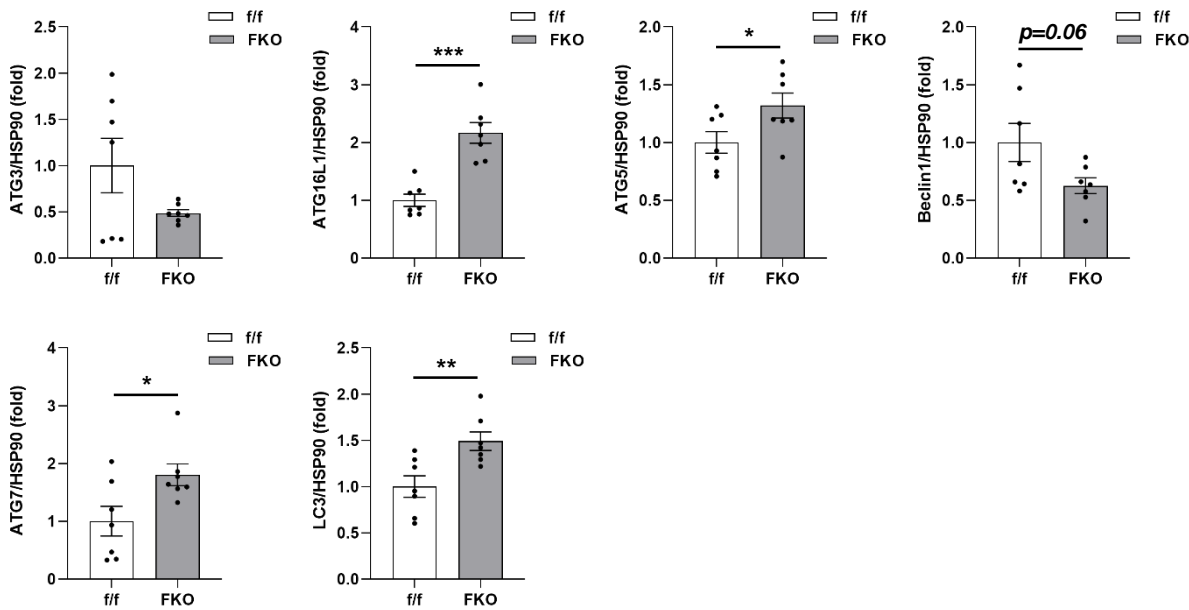

# Supplementary Fig. 8

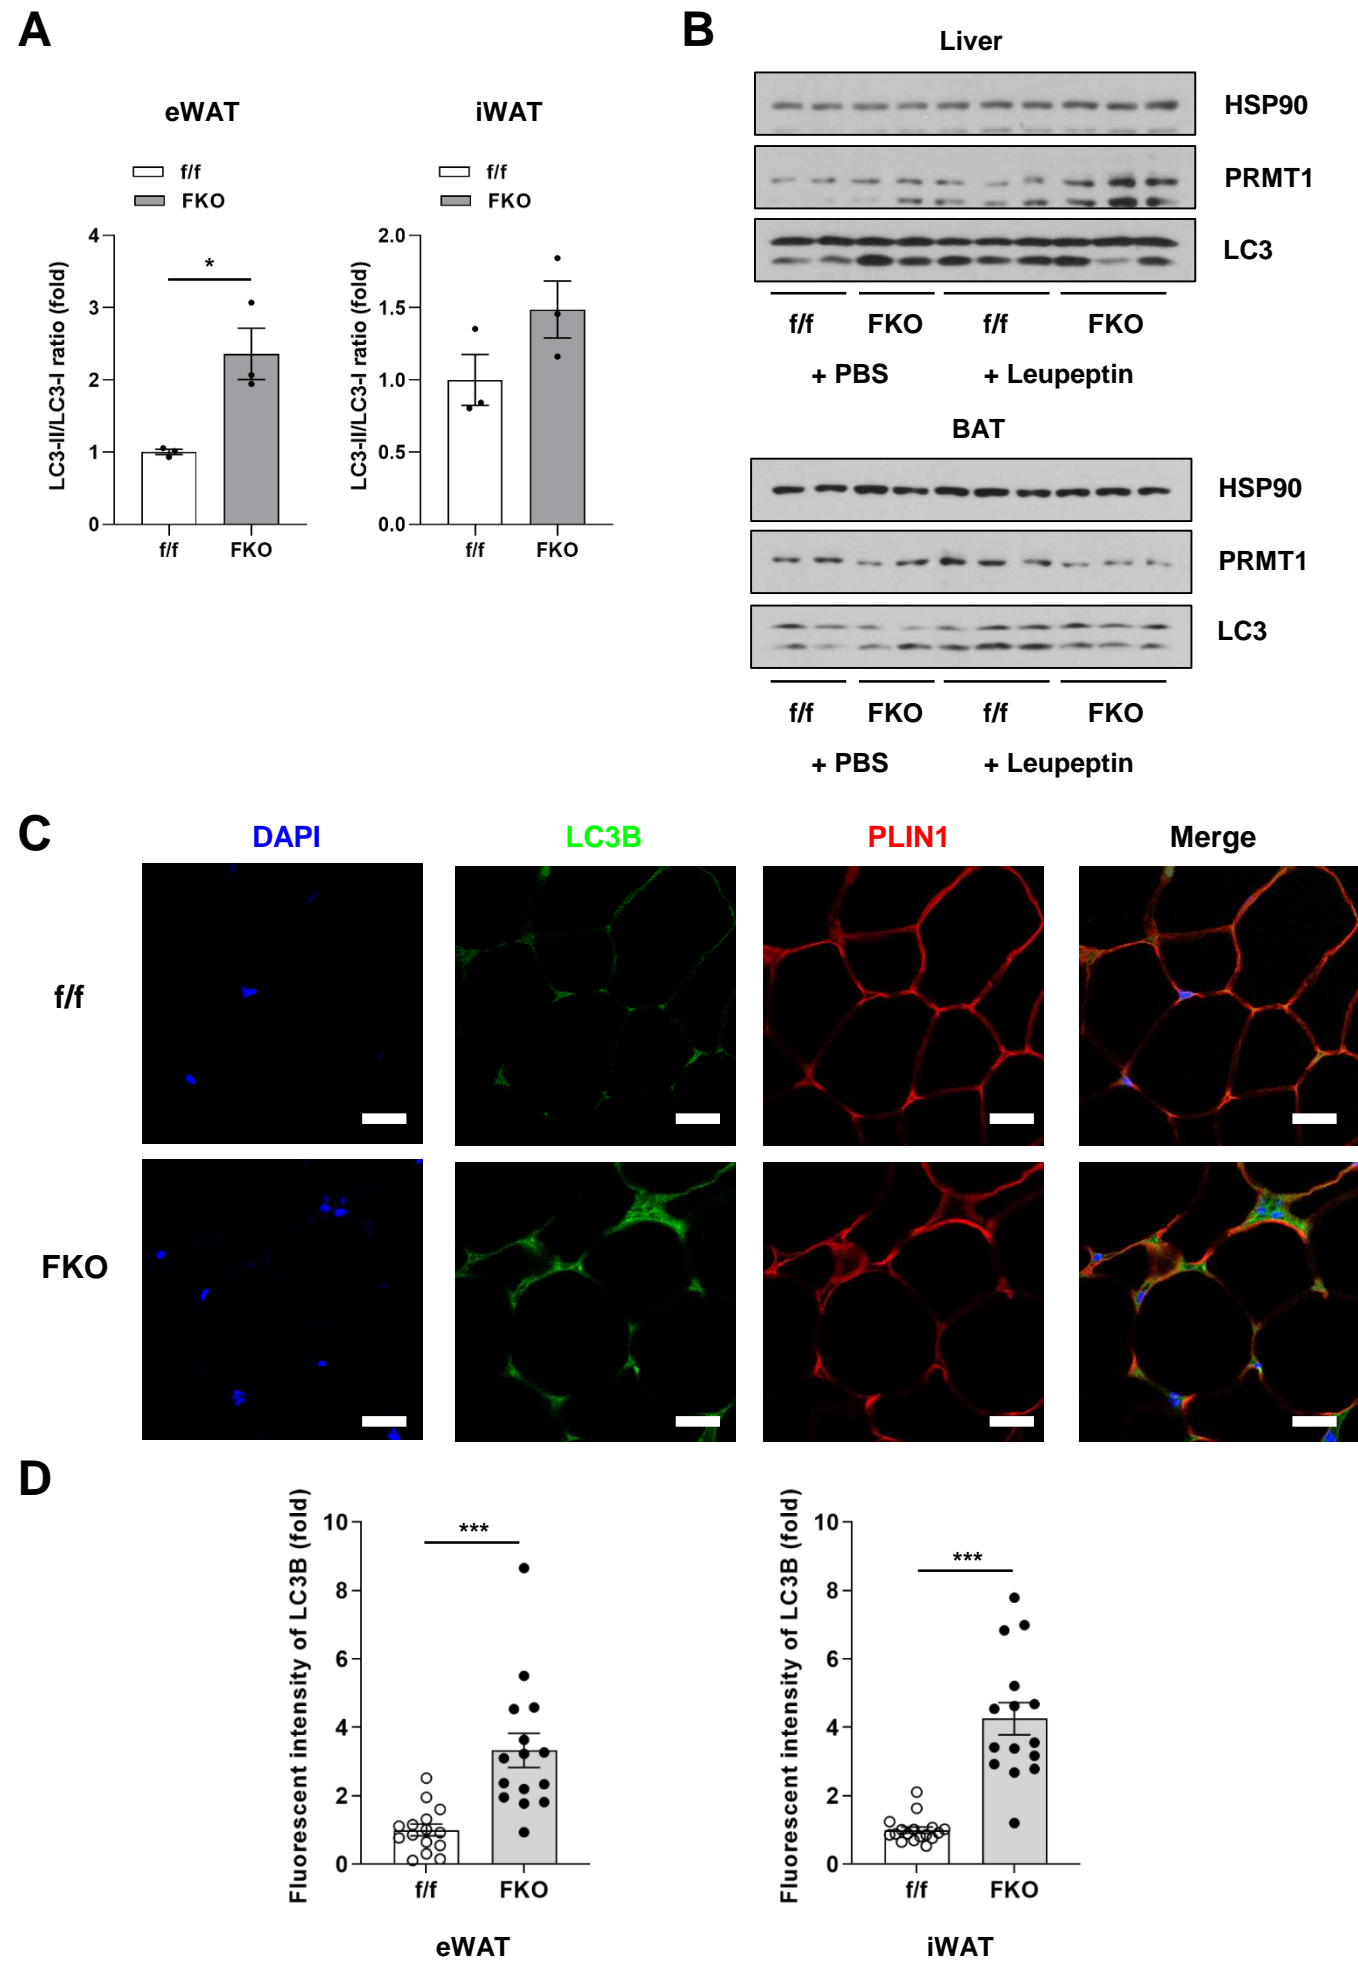

Supplementary Fig. 9

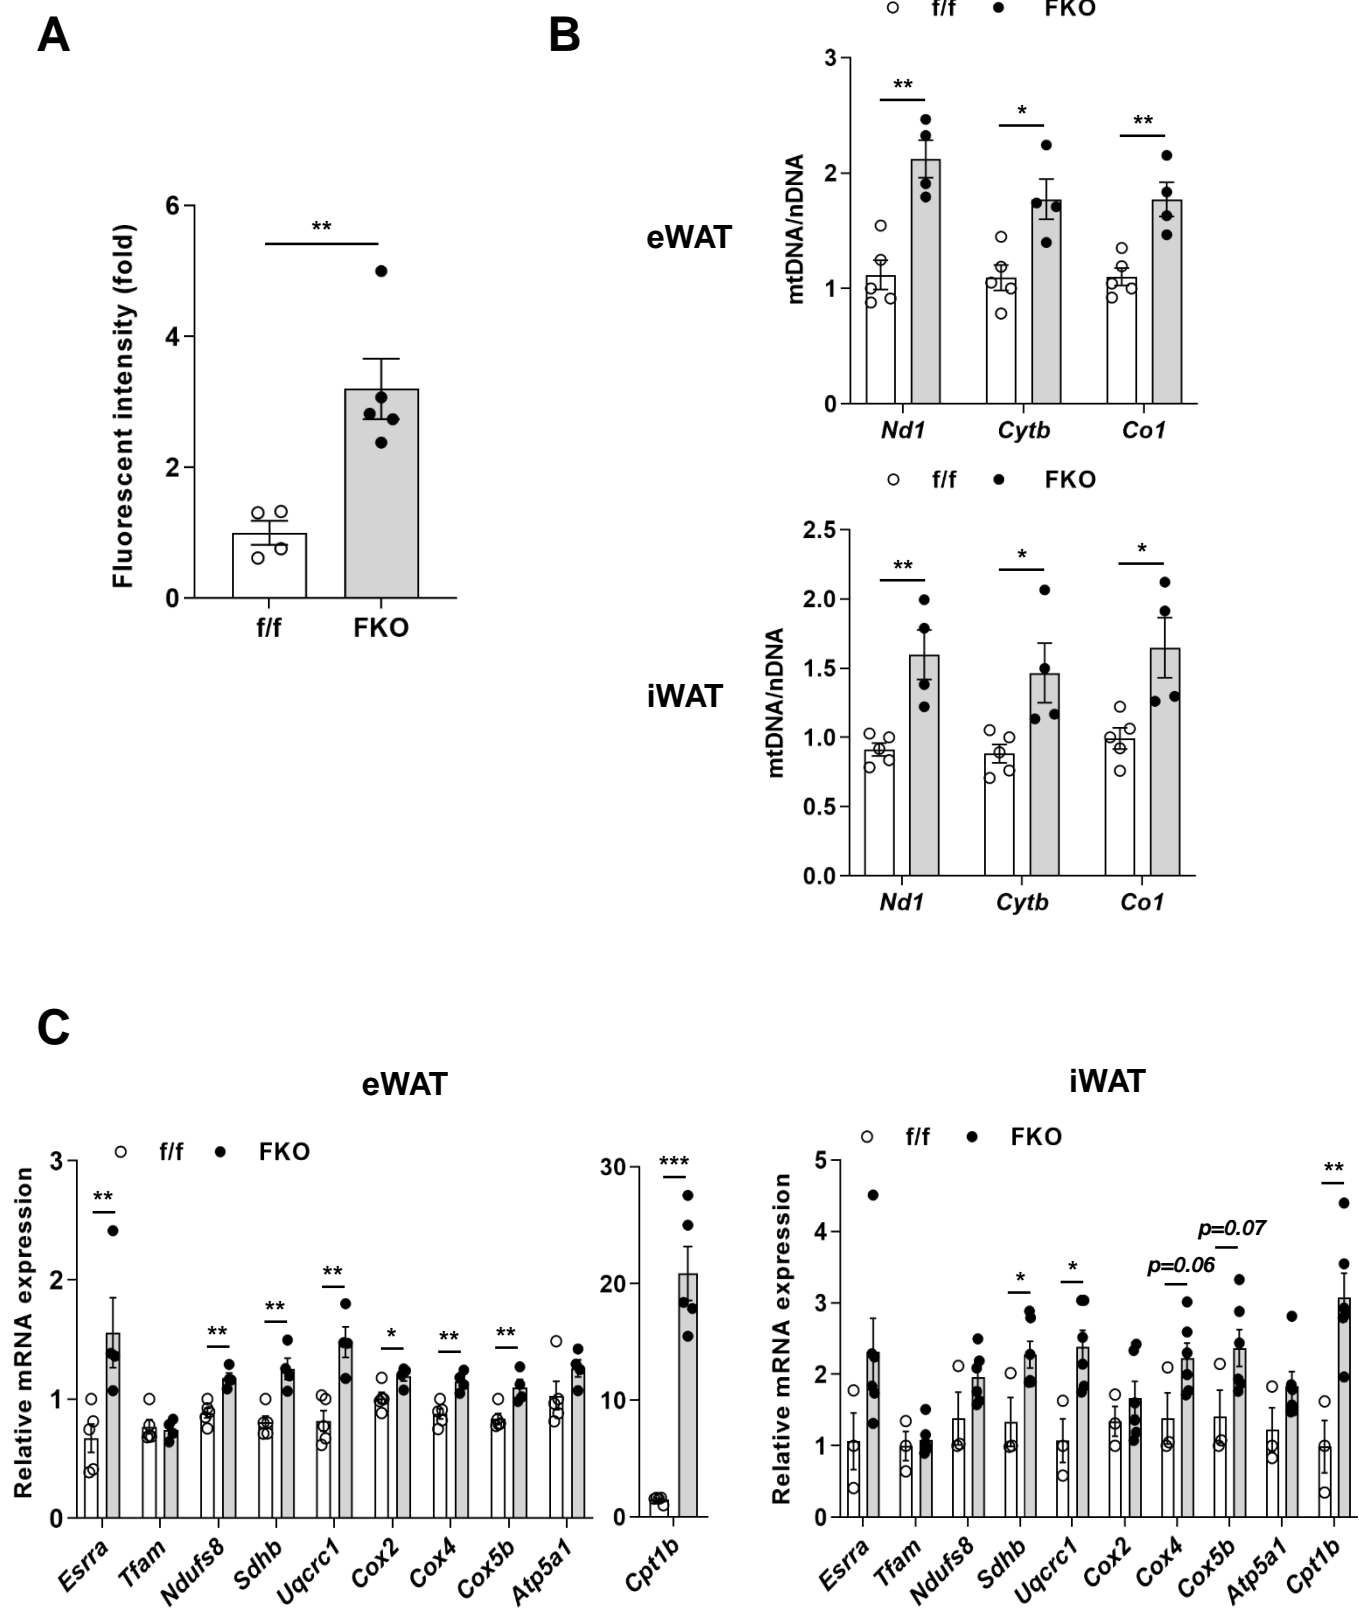

Supplementary Fig. 10

A

rpWAT

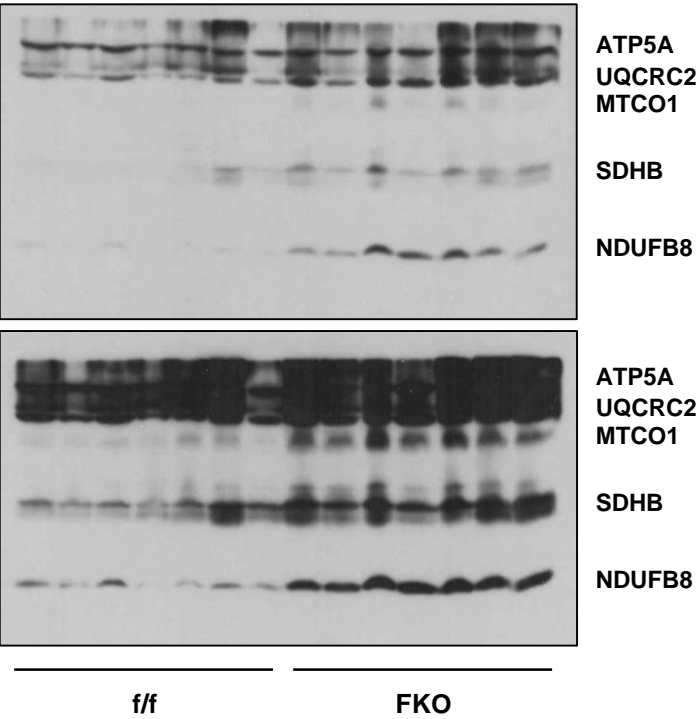

B

pWAT

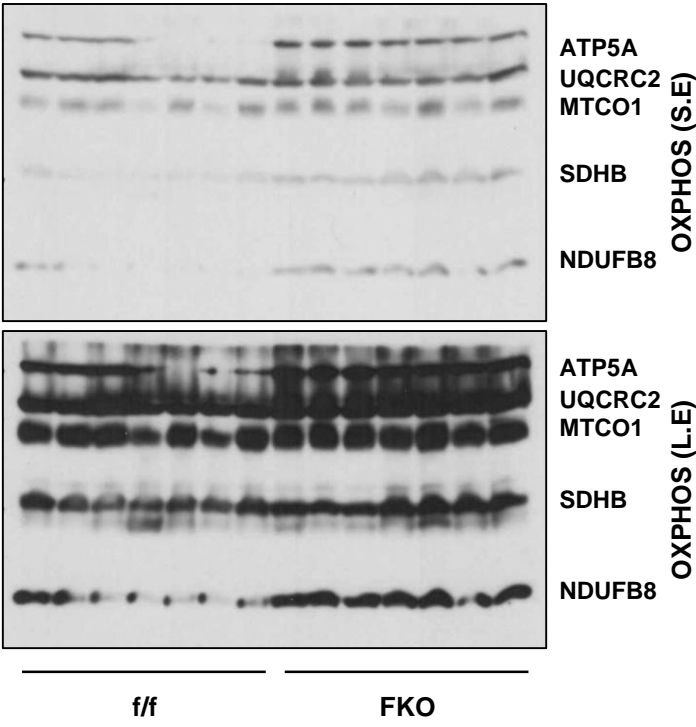

C

iWAT

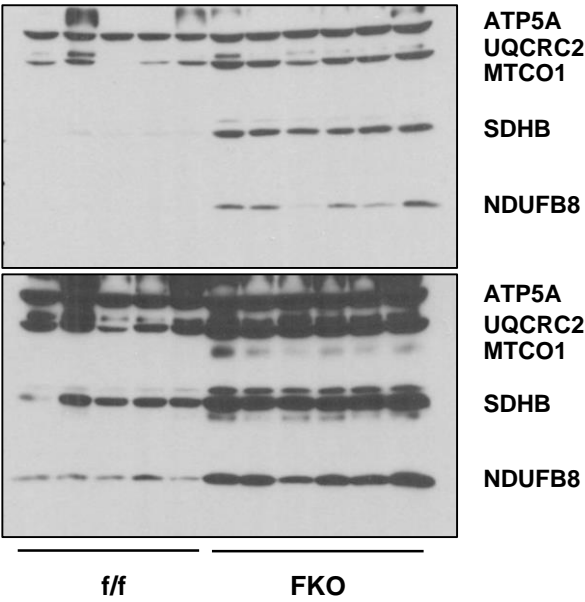

D

BAT

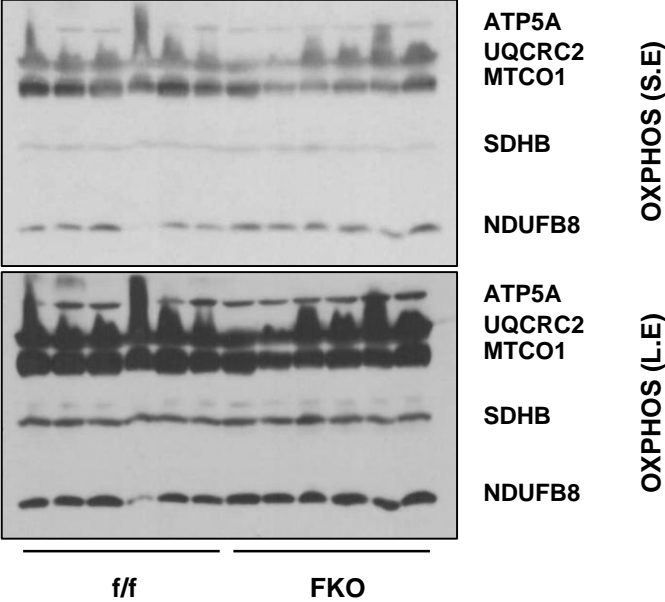



Supplementary Fig. 11

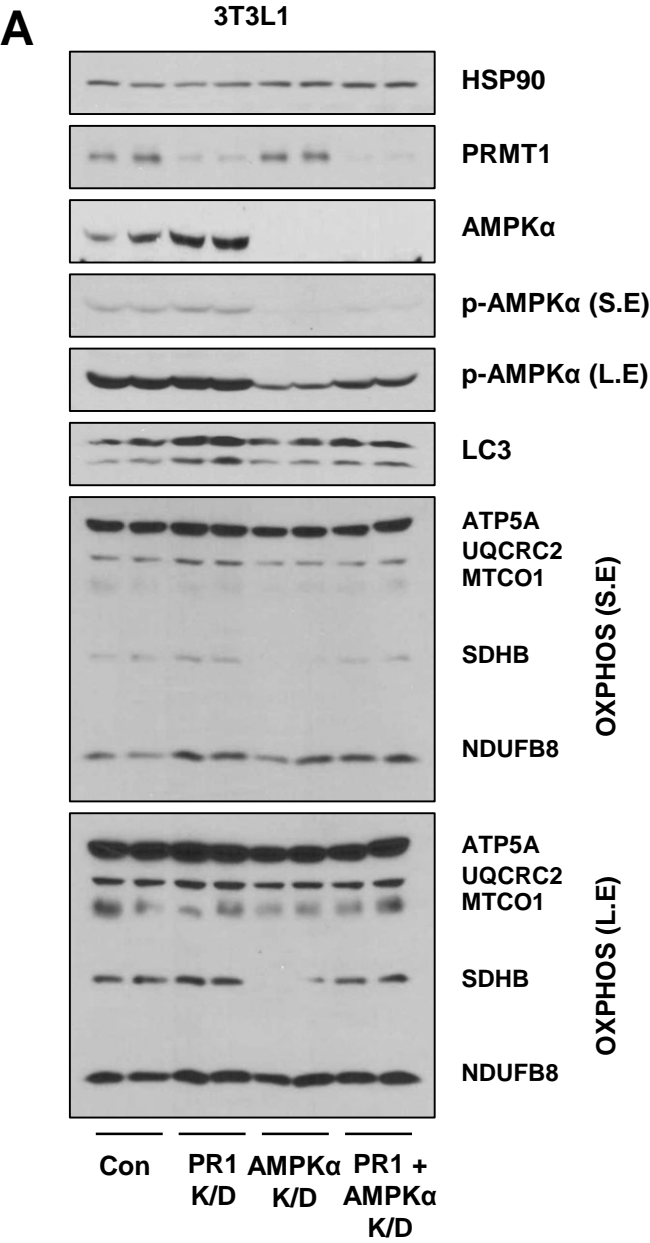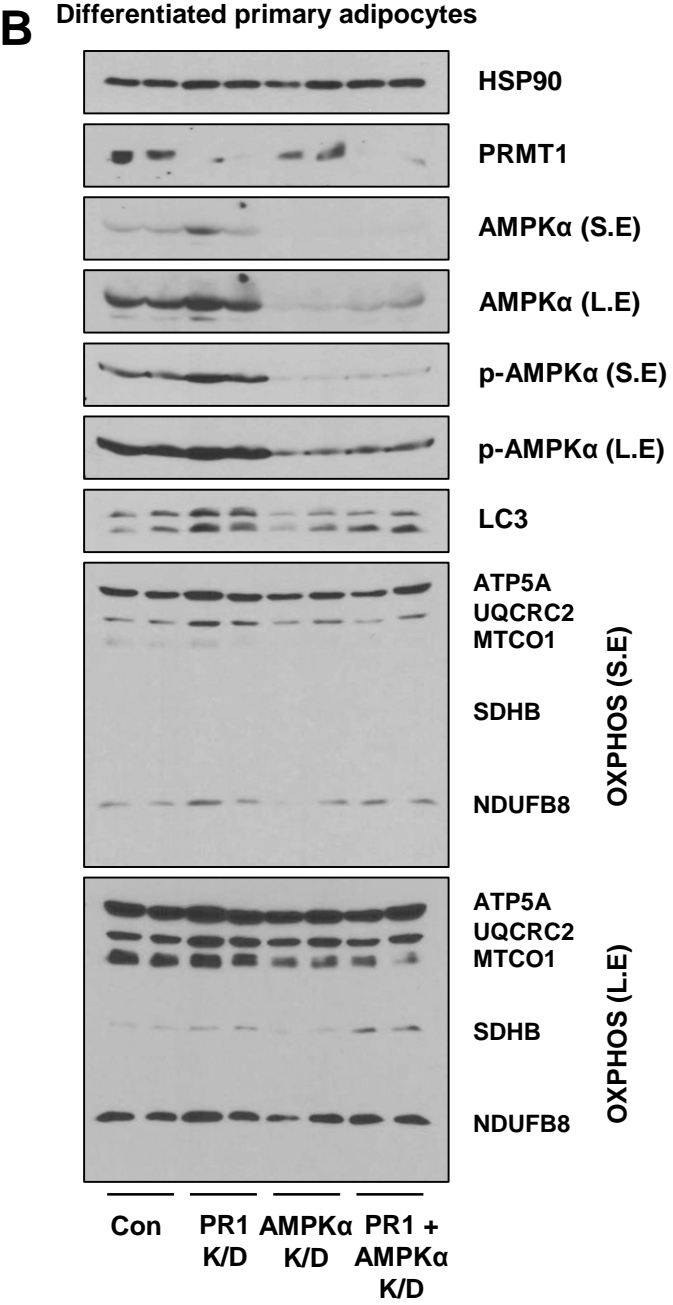

Supplementary Fig. 12

A

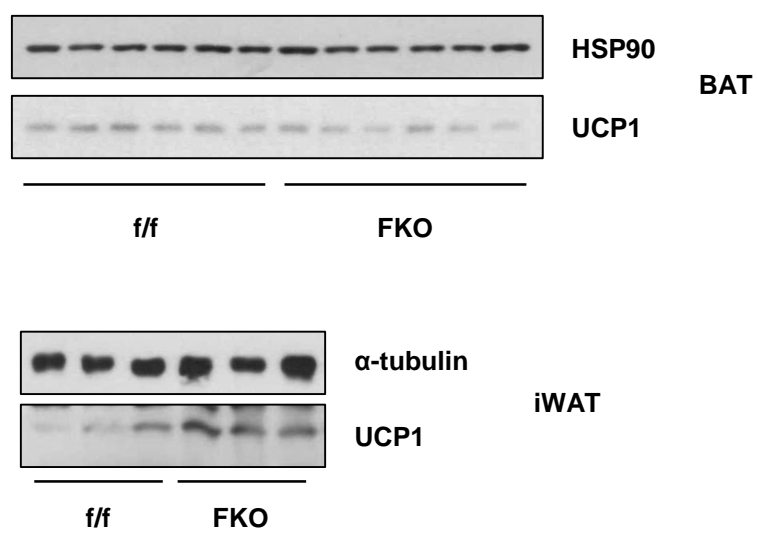

B

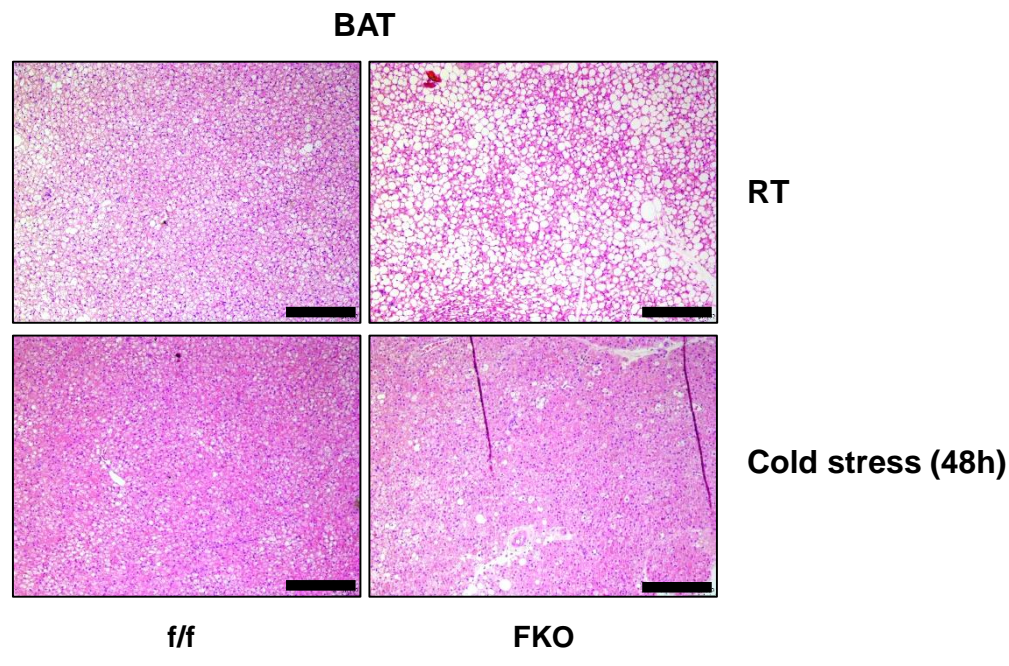

Supplementary Fig. 13

A

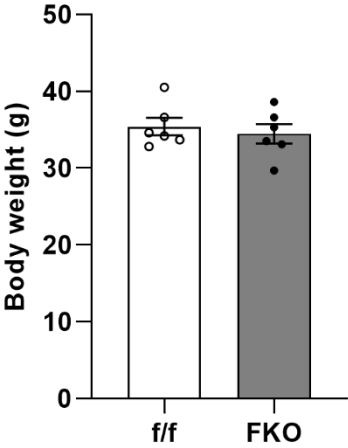

B

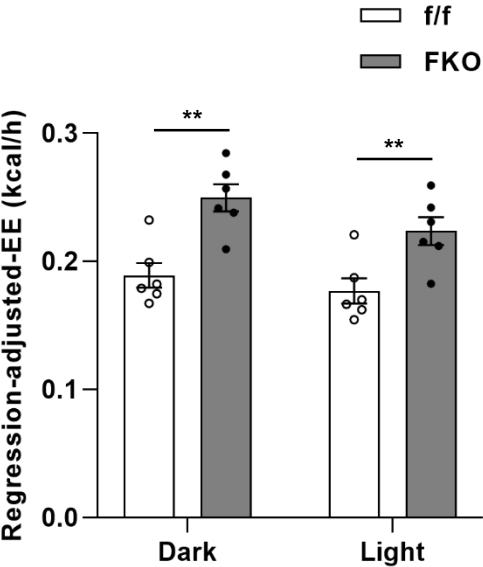

(B.W)

C

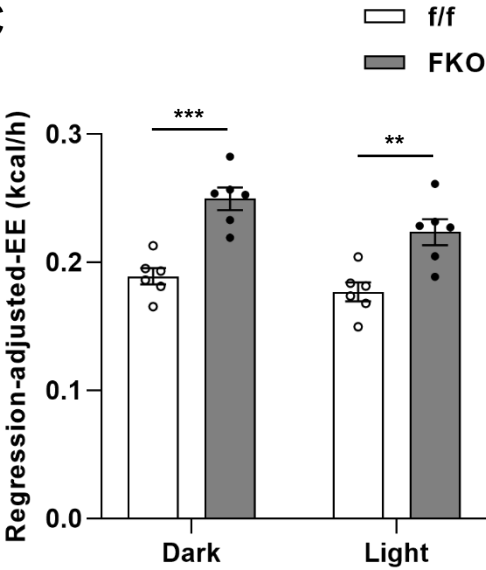

(Food intake)

D

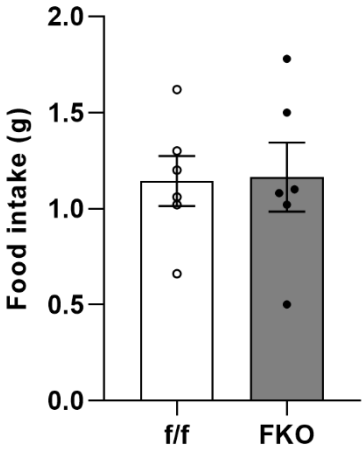

Supplementary Fig. 14

A

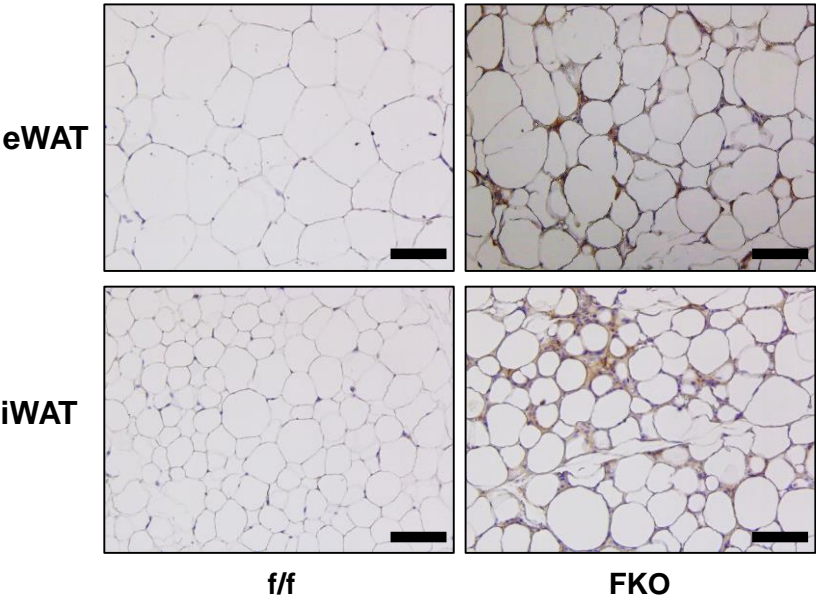

B

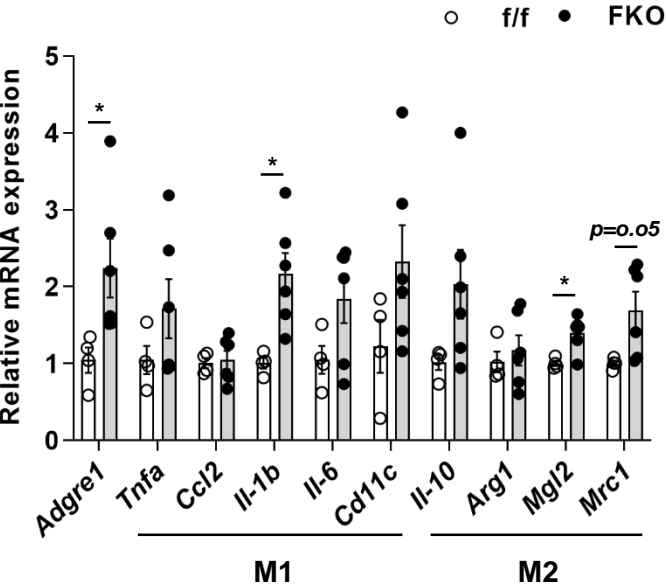

C

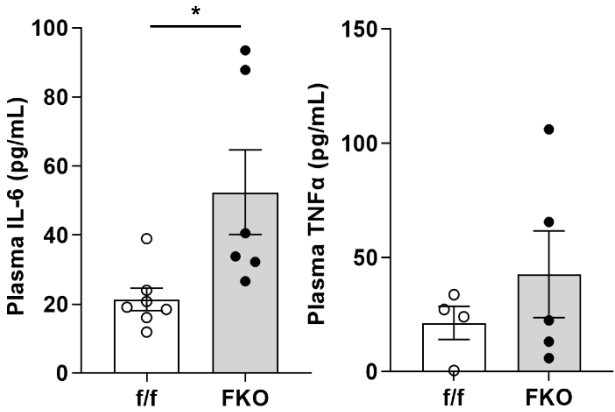

Supplementary Fig. 15

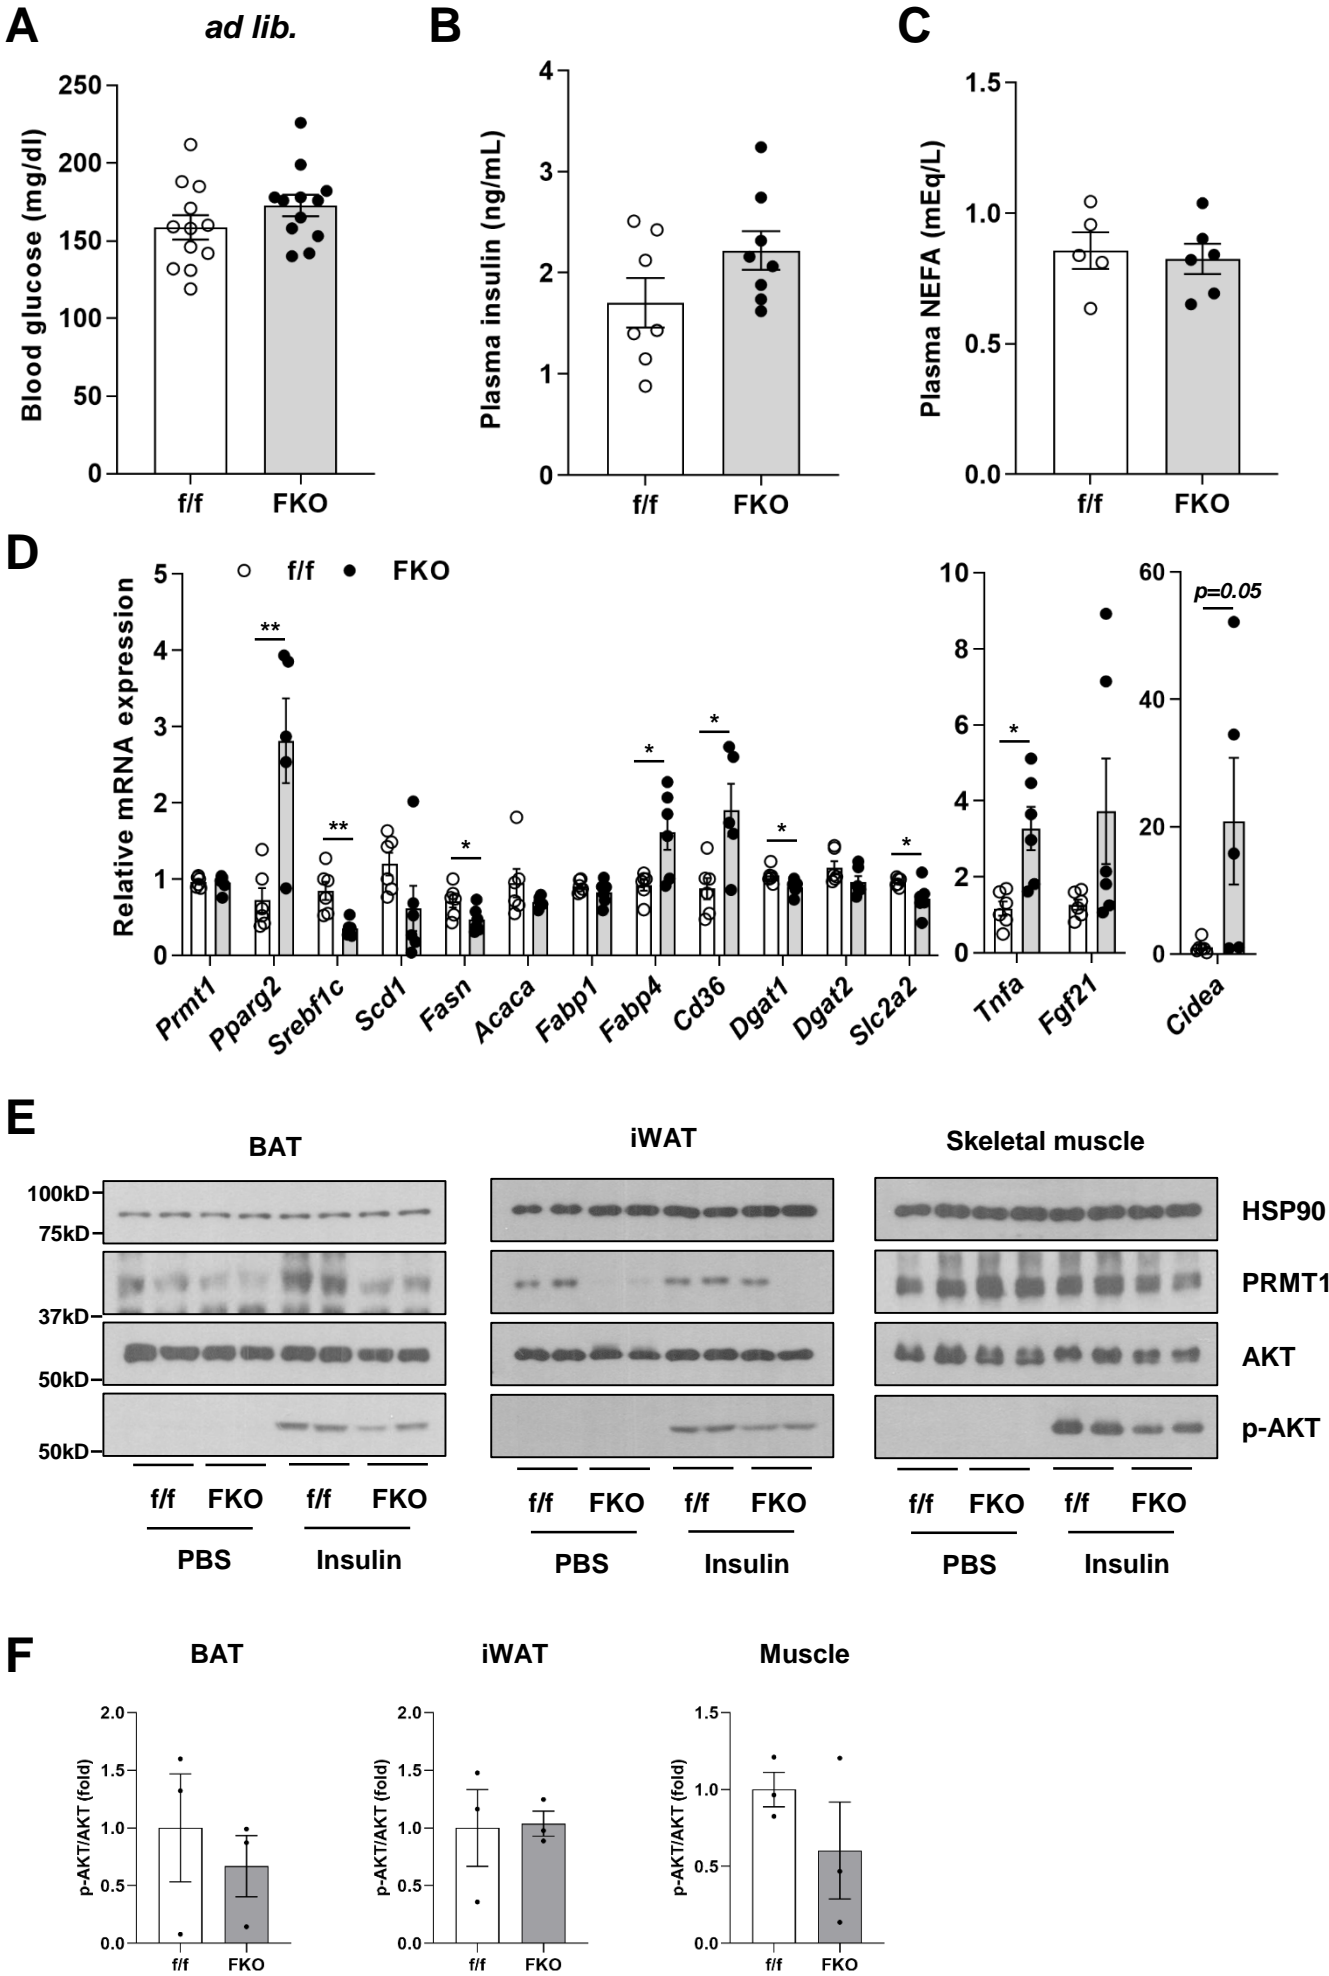

Supplementary Fig. 16

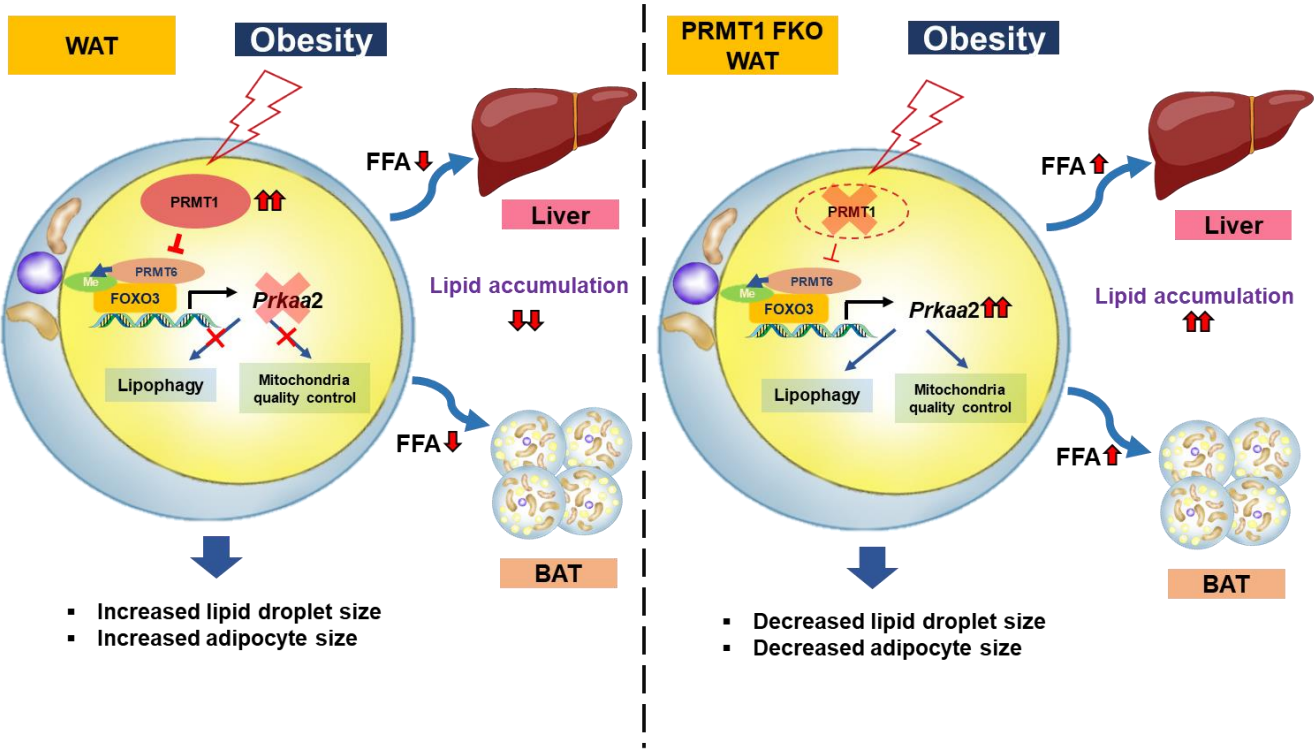

Supplement: Supplementary file 1 [file 28152663]
